# Supplementary material for: Berberine alleviates liver fibrosis through inducing ferrous redox to activate ROS-mediated hepatic stellate cells ferroptosis
Source: PubMed Central journal article supplement (PMC8643357; doi:10.1038/s41420-021-00768-7), 2021-12-04
Supplement: 41420_2021_768_MOESM1_ESM.pdf [file 41420_2021_768_MOESM1_ESM.pdf]

Please complete the table below to indicate the contributions of all named authors to the figures.

Figures 1-6:

|  |
|--|
|  |
|--|

Figure 7:

|  |
|--|
|  |
|--|

Figure 8:

|  |
|--|
|  |
|--|

Supplementary Fig 1:

|  |
|--|
|  |
|--|

Supplementary Figs 2-5:

|  |
|--|
|  |
|--|

Supplementary Figs 6-9:

|  |
|--|
|  |
|--|

Signed for and on behalf of the Author(s):

*Binnu*

Print Name:

Date:
